# Supplementary material for: Assessment of Immunological Potential of Glial Restricted Progenitor Graft In Vivo—Is Immunosuppression Mandatory?
Source: MDPI journal article supplement (doi:10.3390/cells10071804), 2021-07-16
Supplement: s1 [file s1]

Supplementary Figure:

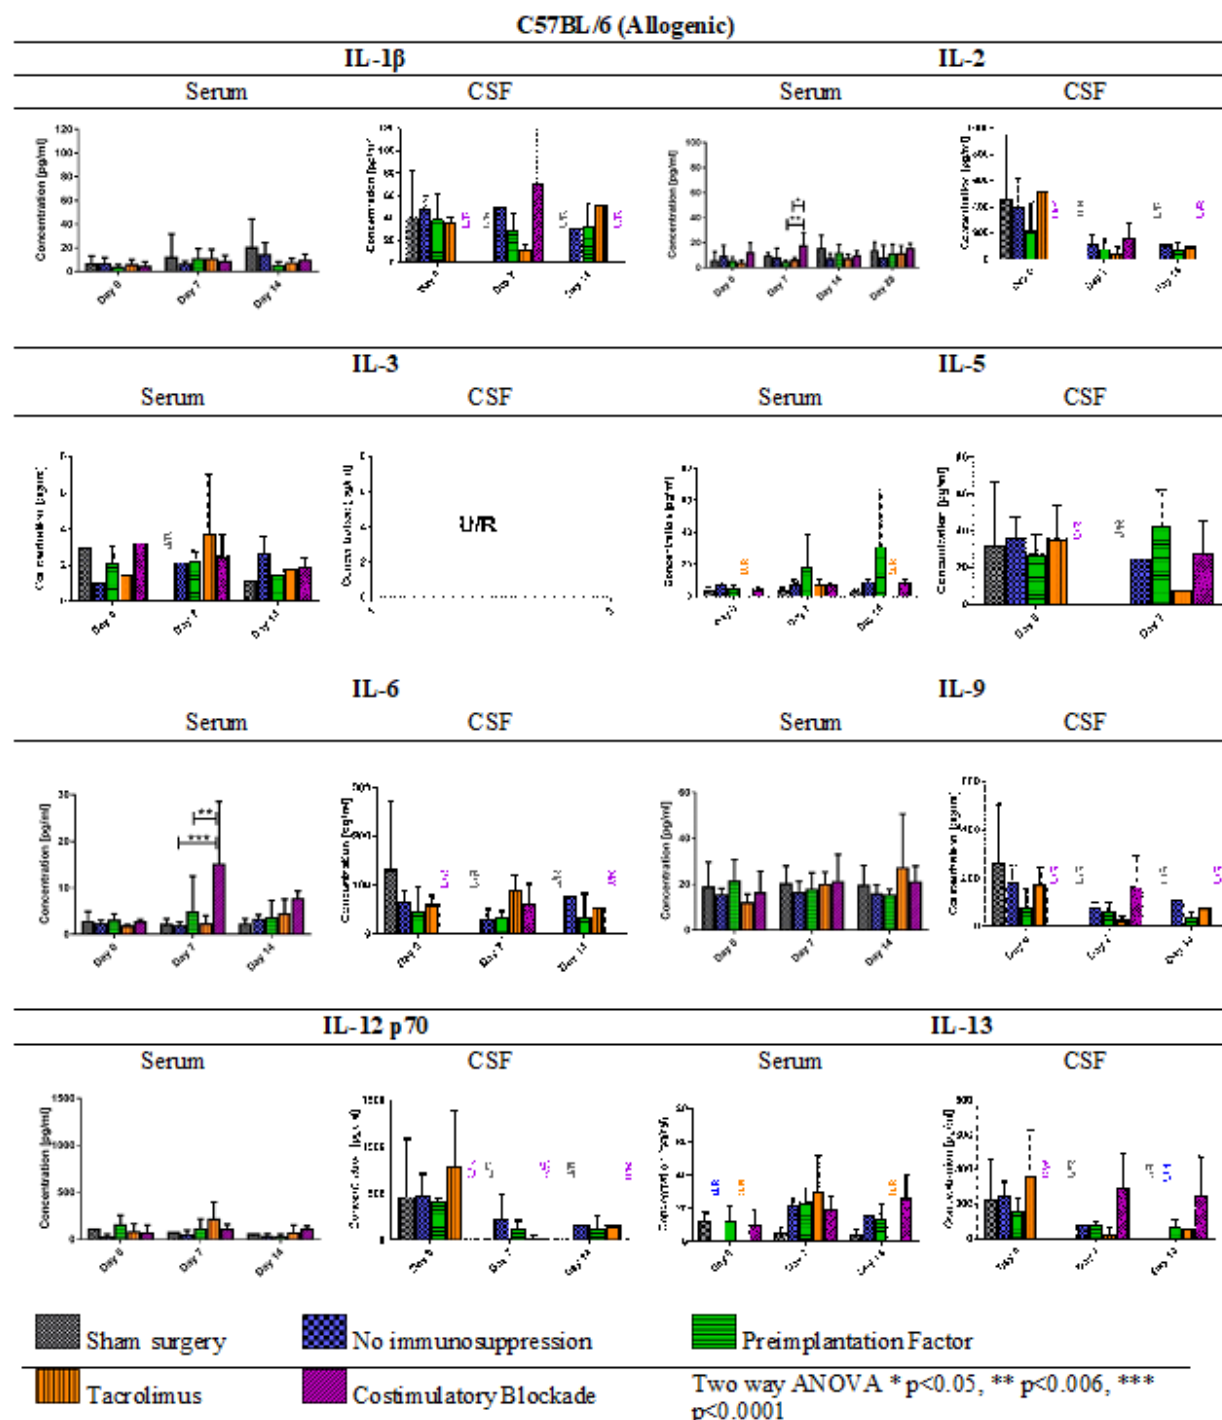

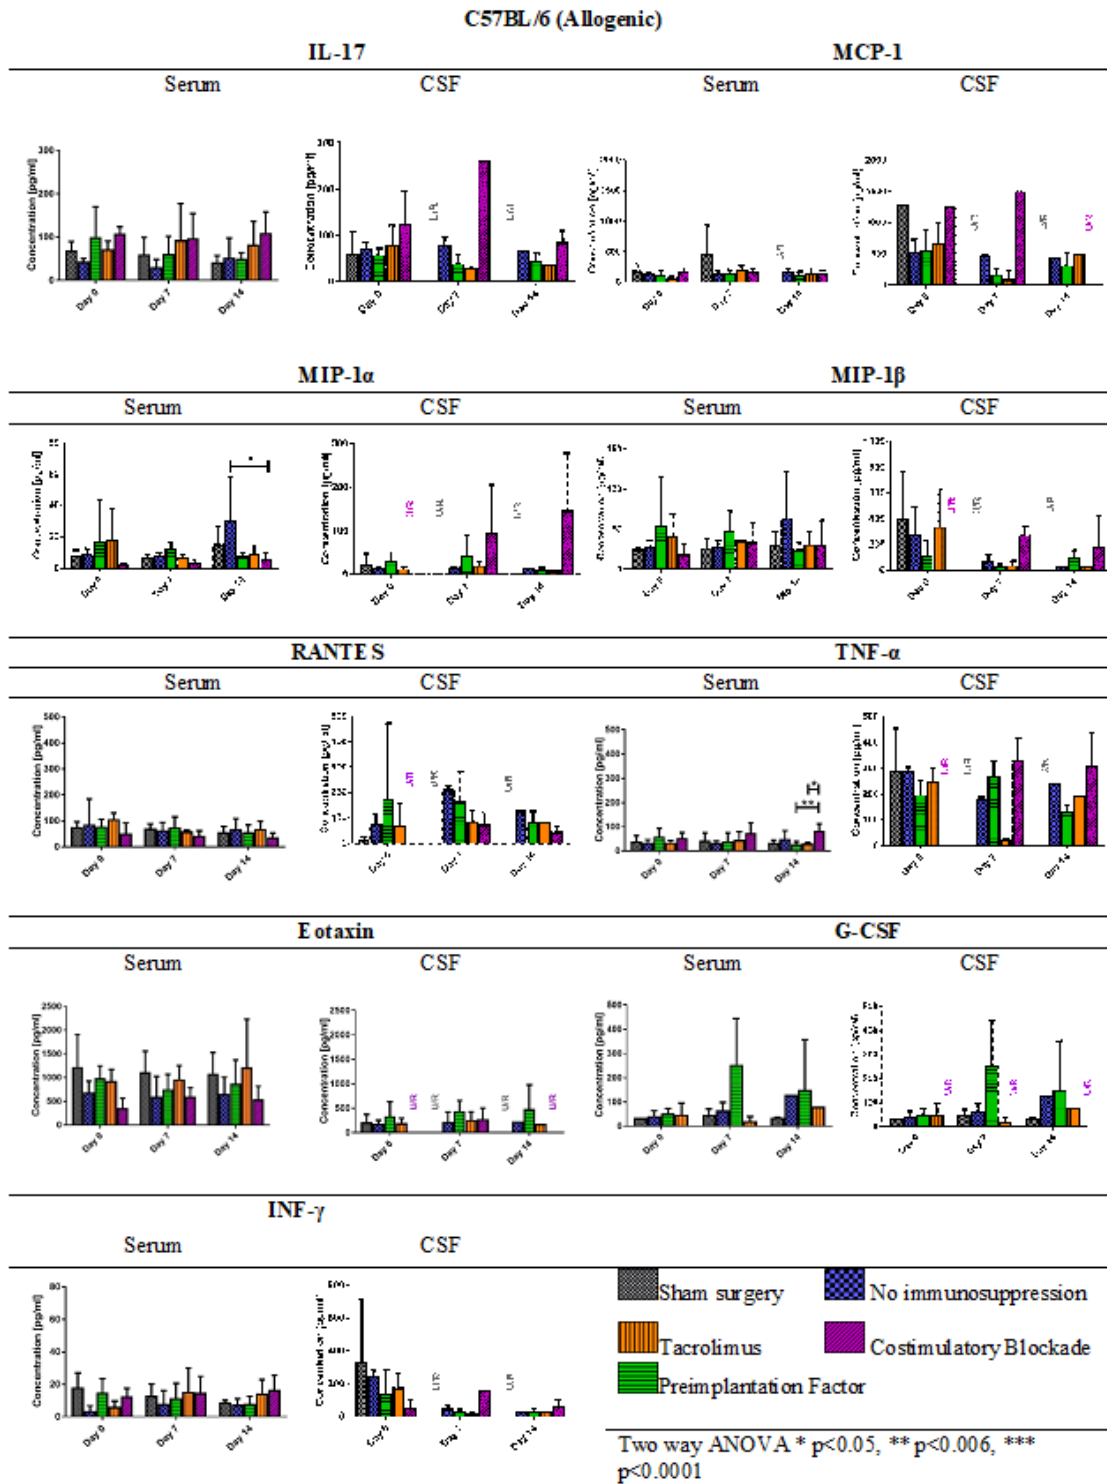

**Fig.S1.** The picture presents multiplex ELISA in serum and CSF of C57BL6 mice in various immunomodulatory and immunosuppressive regimens. Two-way ANOVA; error bars: SEM; n = 3-6 samples per experimental group. Sham group was excluded from statistic calculations.

**IL-1 $\beta$** : there is no significant difference in IL-1 $\beta$  levels between groups (serum and CSF),

**IL-2**: there is significant difference in serum IL-2 levels between:

PiF [12.98 pg/mL] and costimulatory blockade [35.05 pg/mL] (\*\*  $p < 0.01$ ),  
tacrolimus and costimulatory blockade (\*  $p < 0.05$ ) on day 7.

No significant difference measured in CSF,

**IL-3**: there is no significant difference between groups in IL-3 (serum). In CSF the measurements were under detectable range.

**IL-5**: there is no significant difference in IL-5 levels between groups (serum and CSF).

**IL-6**: there is significant difference on day 7 in serum IL-6 levels between:

no immunosuppression group [4.44 pg/mL] and costimulatory blockade group [13.30 pg/mL]  
(\*\*\*  $p < 0.001$ )  
and preimplantation factor and costimulatory blockade group (\*\* $p < 0.01$ ).

No significant difference counted in CSF.

**IL-9**: there is no significant difference in IL-9 levels between groups (serum and CSF),

**IL-12 (p70)**: there is no significant difference in IL-12 (p70) levels between groups (serum and CSF),

**IL-13**: there is no significant difference in IL-13 levels between groups (serum and CSF), although IL-13 levels were measured as visibly highest in CSF in costimulatory blockade group on day 7 and day 14,

**IL-17**: there is no significant difference in IL-17 levels between groups (serum and CSF),

**MCP-1**: there is no significant difference in MCP-1 levels between groups (serum and CSF),

**MIP-1 $\alpha$** : there is a significant difference in MIP-1 $\alpha$  serum level between no immunosuppression group [30.33 pg/mL] and costimulatory blockade group [6.14 pg/mL] (\*  $p < 0.05$ ) on day 14. No significant difference measured in CSF,

**MIP-1 $\beta$** : there is no significant difference in MIP-1 $\beta$  levels between groups (serum and CSF),

**RANTES**: there is no significant difference in RANTES levels between groups (serum and CSF),

**TNF- $\alpha$** : there is a significant difference on day 14 in TNF- $\alpha$  serum level between:

PiF [27.27 pg/mL] and costimulatory blockade [83.52 pg/mL] (\*\*  $p < 0.01$ ),  
tacrolimus [30.17 pg/mL] and costimulatory blockade [83.52 pg/mL] (\*  $p < 0.05$ ).

**Eotaxin**: there is no significant difference in Eotaxin levels between groups (serum and CSF),

**G-CSF**: there is no significant difference in G-CSF levels between groups (serum and CSF), however highest concentrations were measured in PiF group, both in serum and CSF.

**IFN- $\gamma$** : there is no significant difference in IFN- $\gamma$  levels between groups (serum and CSF),

# DBA1 (Semiallogenic)

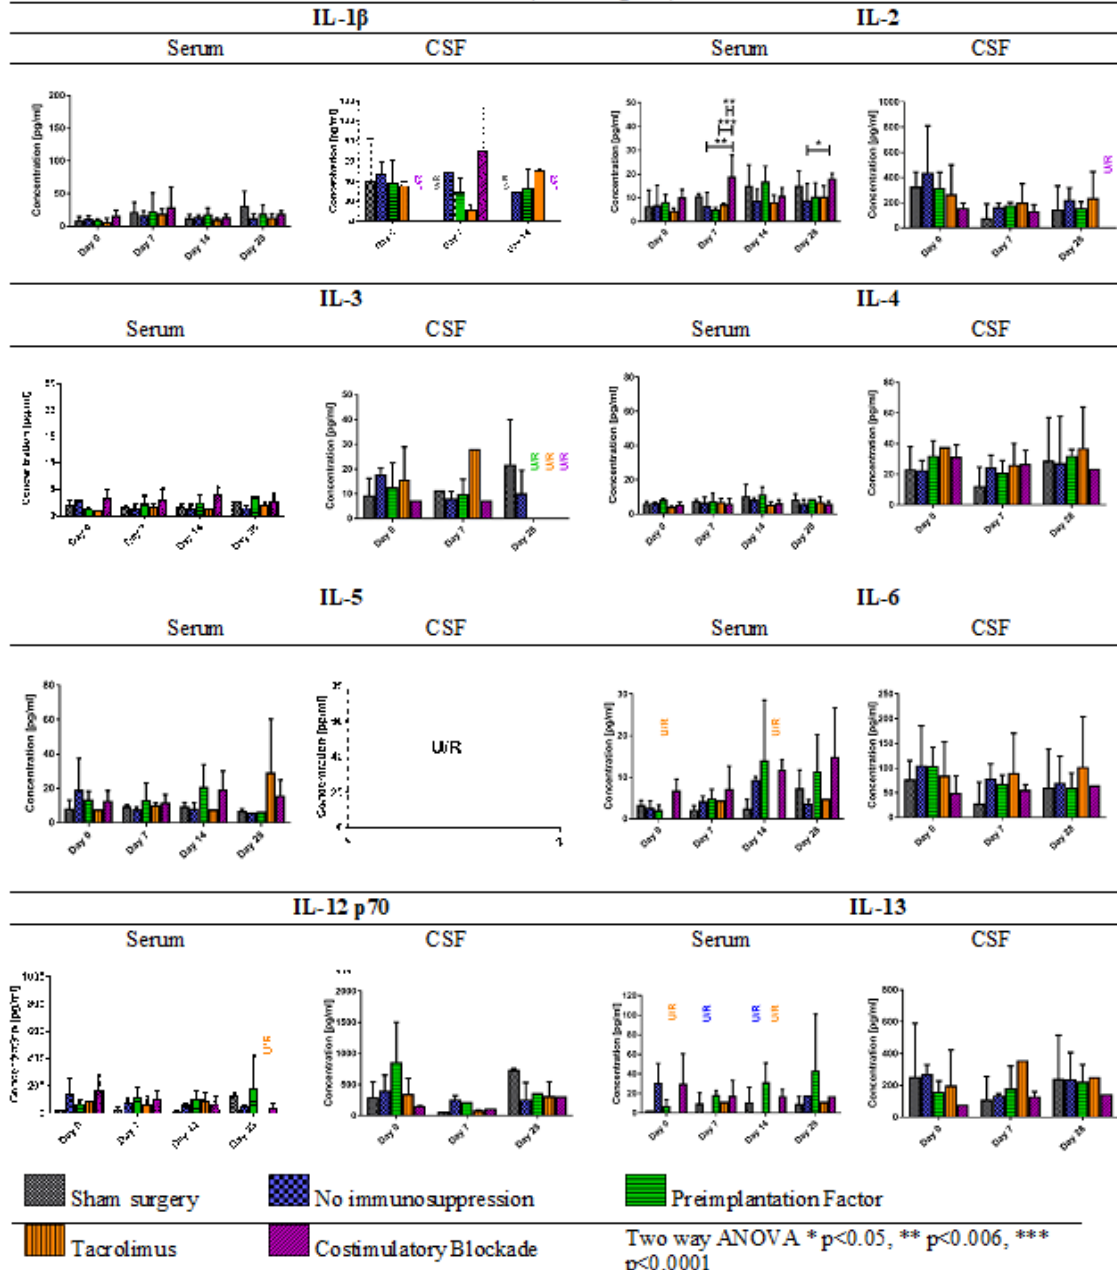

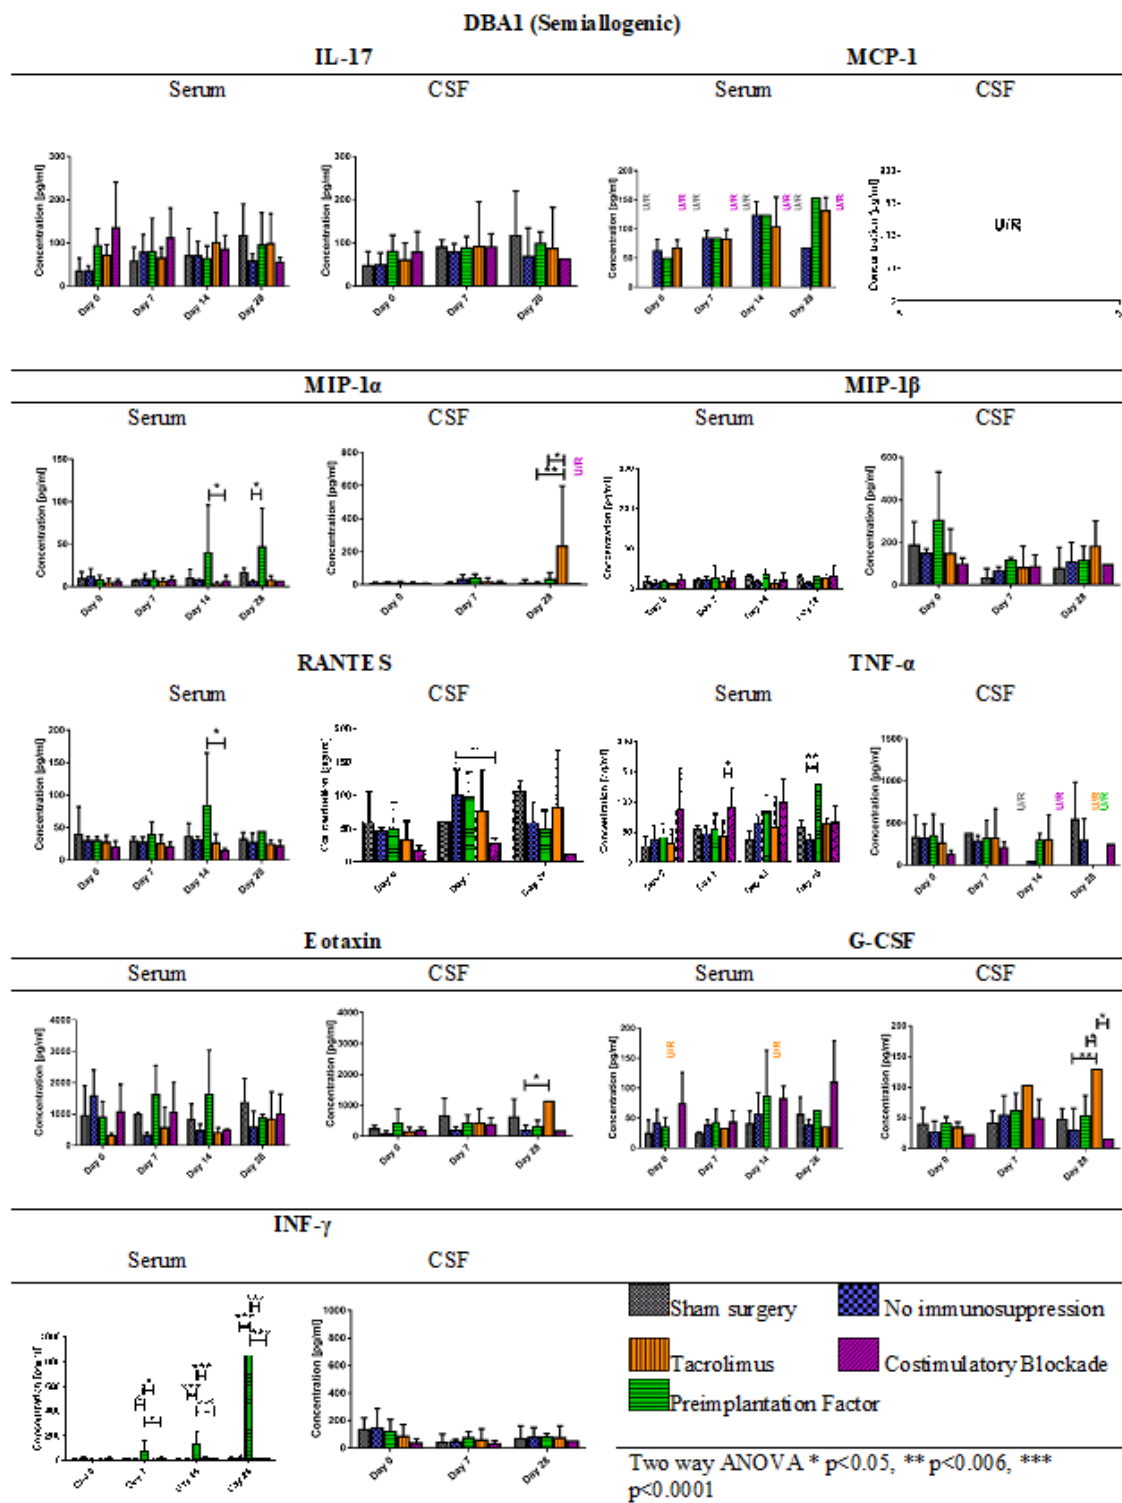

**Fig. S2.** The picture presents multiplex ELISA in serum and CSF of DBA1 mice in various immunomodulatory and immunosuppressive regimens. Two-way ANOVA; error bars: SEM;  $n = 2-6$  samples per experimental group. Sham group was excluded from statistic calculations.

**IL-1β:** there is no significant difference in IL-1β levels between groups (serum and CSF),

**IL-2:** there is significant difference in serum IL-2 levels:

on day 7 between no immunosuppression [6.51 pg/mL] and costimulatory blockade [18.94] (\*\* p<0.01),

PiF [5.01 pg/mL] and costimulatory blockade [18.98 pg/mL] (\*\* p<0.001)

tacrolimus [7.15 pg/mL] and costimulatory blockade [18.98 pg/mL] (\*\* p<0.01) groups

on day 28 between no immunosuppression [8.92 pg/mL] and costimulatory blockade [18.17 pg/mL] groups (\* p<0.05).

No significant difference measured in CSF,

**IL-3:** there is no significant difference between groups in IL-3 (serum, CSF).

**IL-4:** there is no significant difference in IL-4 levels between groups (serum and CSF),

**IL-5:** there is no significant difference in IL-5 levels between groups (serum). In CSF the measurements were under detectable range,

**IL-6:** there is no significant difference in IL-6 levels between groups (serum and CSF),

**IL-9:** there is no significant difference in IL-9 levels between groups (serum and CSF),

**IL-12 (p70):** there is no significant difference in IL-12 (p70) levels between groups (serum and CSF),

**IL-13:** there is no significant difference in IL-13 levels between groups (serum and CSF),

**IL-17:** there is no significant difference in IL-17 levels between groups (serum and CSF),

**MCP-1:** there is no significant difference in MCP-1 levels between groups (serum). In CSF the measurements were under detectable range,

**MIP-1α:** there is a significant difference in MIP-1α serum level:

on day 14 between PiF [40.96 pg/mL] and costimulatory blockade group [7.61 pg/mL] (\* p<0.05)

on day 28 between no immunosuppression group [6.61 pg/mL] and PiF group [47.84 pg/mL] (\* p<0.05).

The significant differences in MIP-1α in CSF on day 28 was measured between:

no immunosuppression [11.51 pg/mL] and tacrolimus [237 pg/mL] (\*\* p<0.01) group

PiF [37.05 pg/mL] and tacrolimus [237 pg/mL] group (\* p<0.05).

**MIP-1β:** there is no significant difference in MIP-1β levels between groups (serum and CSF),

**RANTES:** there is a significant difference in RANTES levels in serum between PiF [85.25 pg/mL] and costimulatory blockade group [15.59 pg/mL] on day 14 (\*p<0.05). There was measured significant differences in CSF between no immunosuppression [100.8 pg/mL] and costimulatory blockade group [29.01 pg/mL] on day 7 (\* p<0.05).

**TNF-α:** there is a significant difference in TNF-α serum level:

Day 7 between tacrolimus [44.88 pg/mL] and costimulatory blockade [92.43 pg/mL] (\* p<0.05)

Day 28 no immunosuppression group [37.97 pg/mL] and PiF [130.7 pg/mL] (\*\* p<0.01),

**Eotaxin:** there is no significant difference in Eotaxin levels between groups (serum). There is significant difference between Eotaxin CSF levels between no immunosuppression group [224 pg/mL] and tacrolimus group [1149 pg/mL] on day 28 (\*  $p < 0.05$ ).

**G-CSF:** there is no significant difference in G-CSF levels between groups (serum). There is significant difference in G-CSF levels in CSF on day 28 between:

no immunosuppression [31.62 pg/mL] and tacrolimus group [130.7 pg/mL] (\*\*  $p < 0.01$ ),  
PiF [54.36 pg/mL] and tacrolimus group [130.7 pg/mL] (\*  $p < 0.05$ ),  
tacrolimus [130.7 pg/mL] and costimulatory blockade [16.83 pg/mL] group (\*  $p < 0.05$ ).

**IFN- $\gamma$ :** there is significant difference in serum IFN- $\gamma$  levels on:

Day 7, between PiF [79.61 pg/mL] and:

no immunosuppression group [9.8 pg/mL], (\*  $p < 0.05$ )  
tacrolimus group [6.67 pg/mL], (\*  $p < 0.05$ )  
costimulatory blockade group [2.82 pg/mL], (\*  $p < 0.05$ ),

Day 14, between PiF [134.3 pg/mL] and:

no immunosuppression group [10.09 pg/mL], (\*\* $p < 0.001$ ),  
tacrolimus group [12.28 pg/mL], (\*\* $p < 0.001$ ),  
costimulatory blockade group [15.84 pg/mL], (\*\* $p < 0.001$ ),

Day 28, between PiF [857 pg/mL] and:

no immunosuppression group [15.44 pg/mL], (\*\* $p < 0.001$ )  
tacrolimus group [12.64 pg/mL], (\*\* $p < 0.001$ )  
costimulatory blockade group [13.18 pg/mL], (\*\* $p < 0.001$ )

# SOD1G93A (Allogenic)

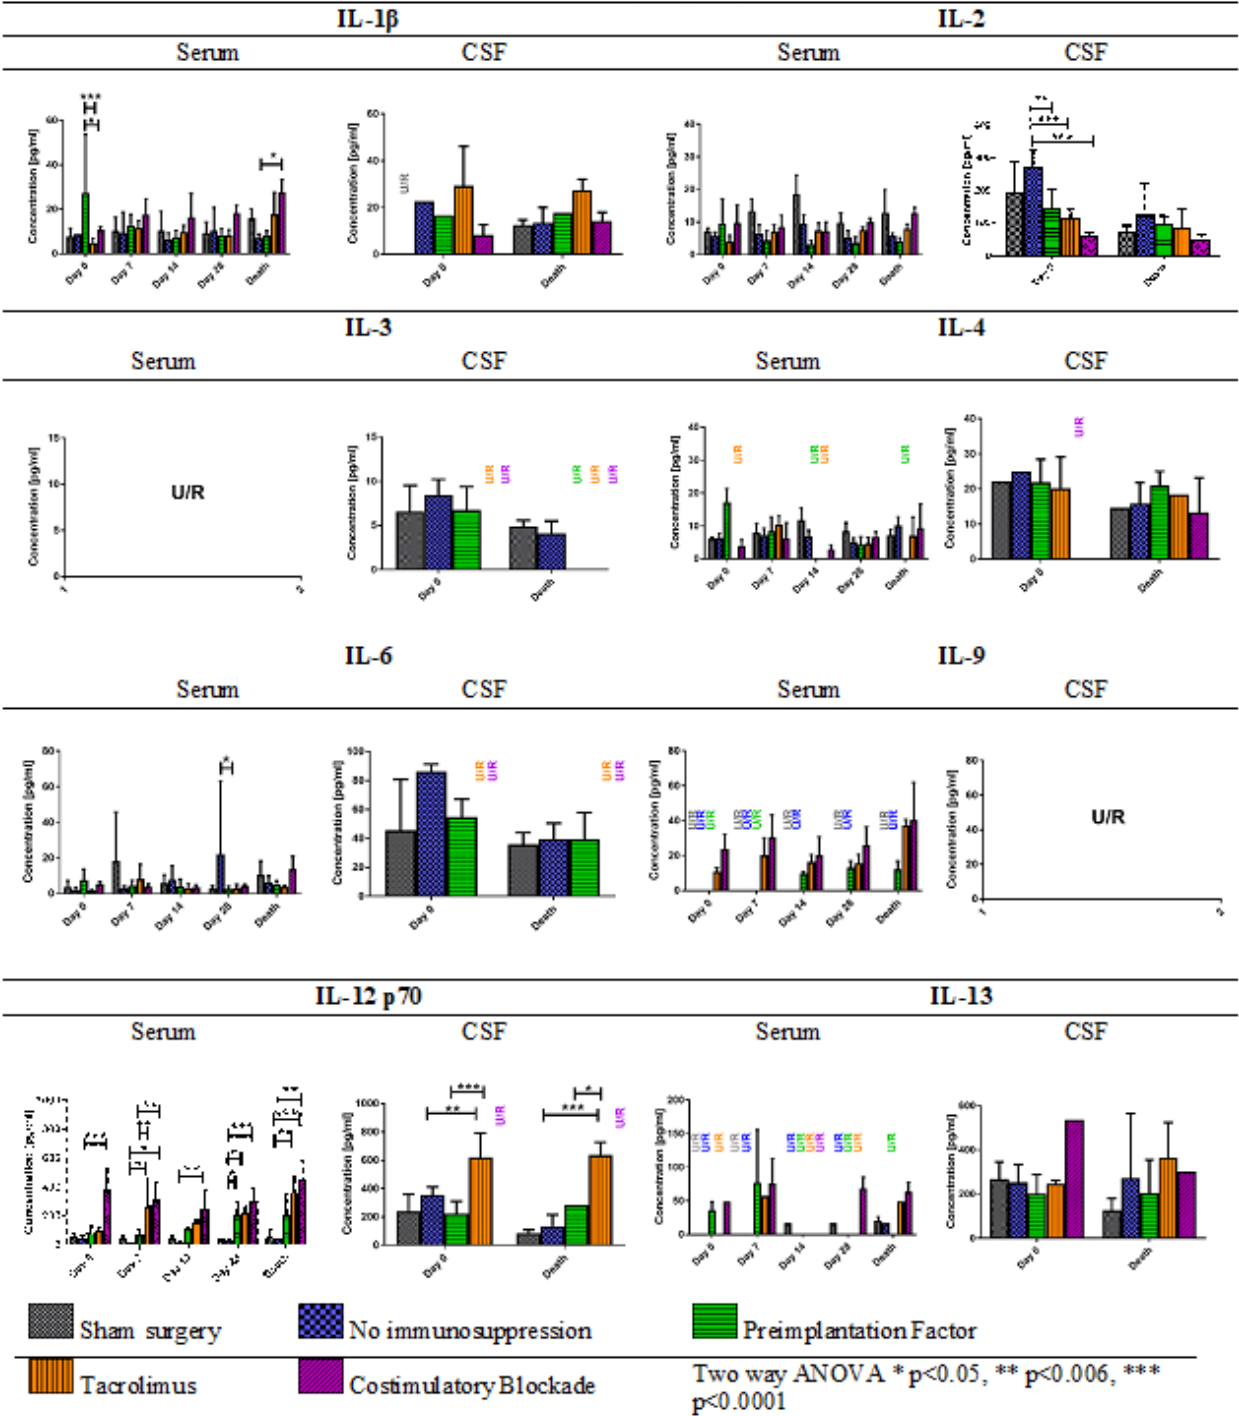



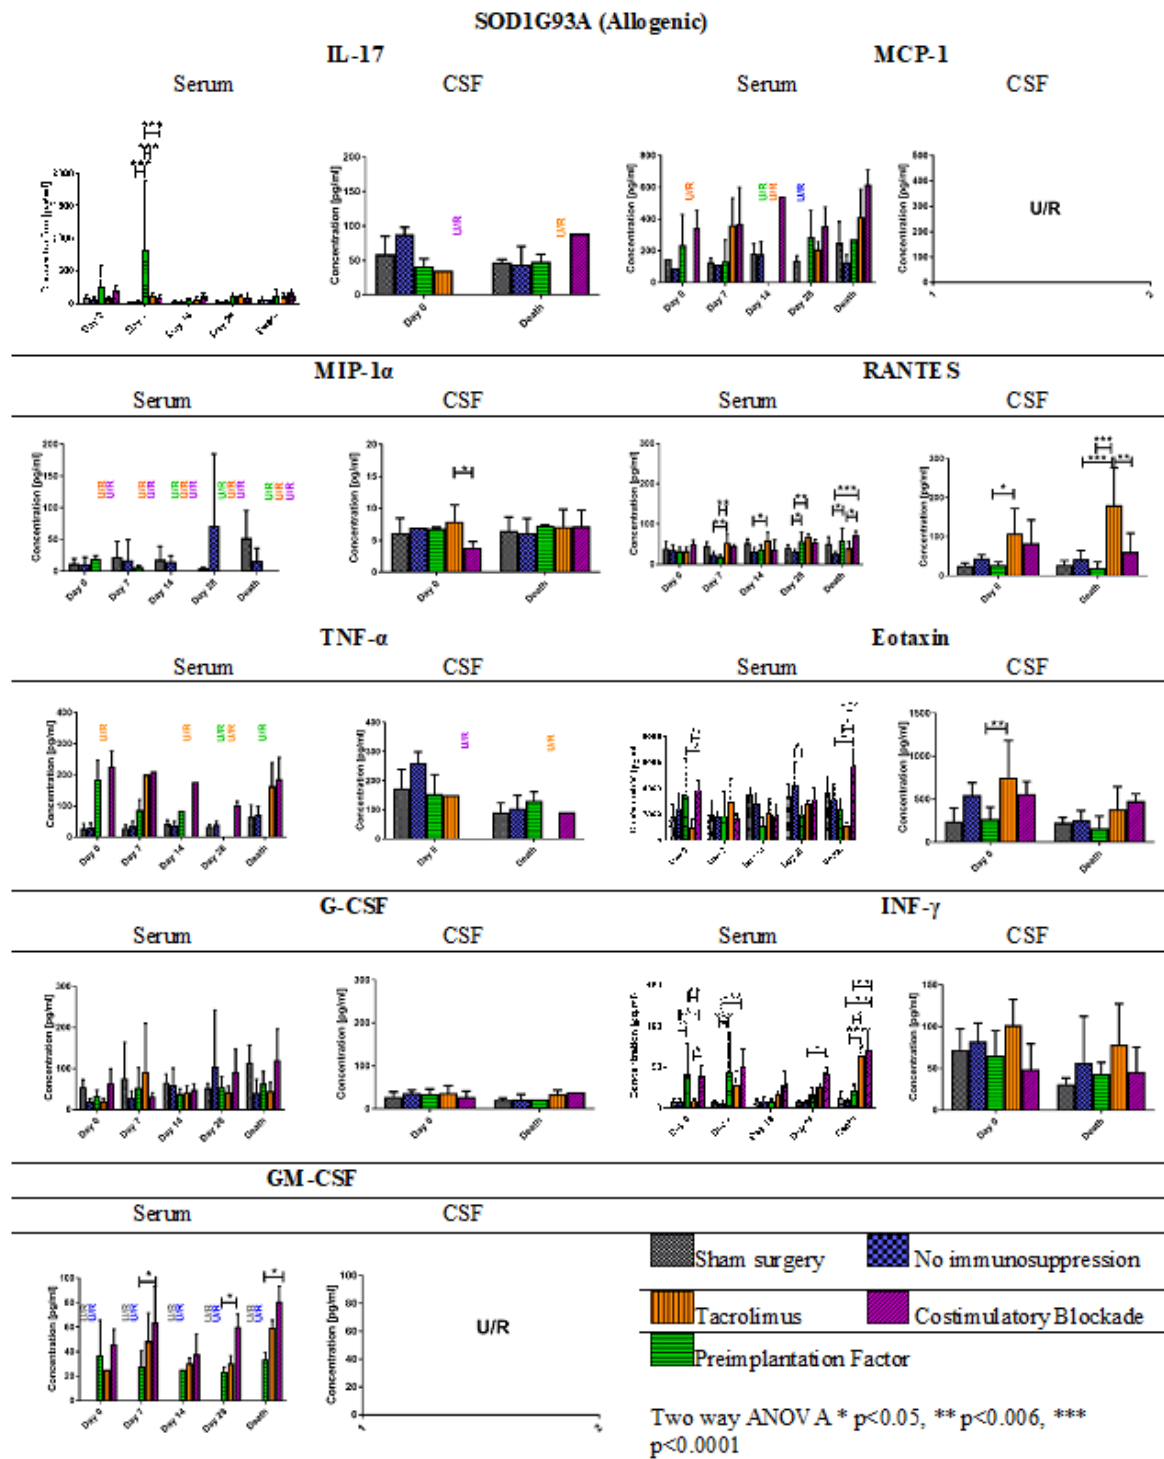

**Fig. S3.** The picture presents multiplex ELISA in serum and CSF of SOD1 G93A mice in various immunomodulatory and immunosuppressive regimens. Two-way ANOVA; error bars: SEM; n = 2-6 samples per experimental group. Sham group was excluded from statistic calculations.

**IL-1β:** there is significant difference in serum IL-1β levels on the day of death between:

no immunosuppression [7.05 pg/mL] and costimulatory blockade groups [27.58 pg/mL] (\* $p < 0.05$ ),

preimplantation factor [27.36 pg/mL] and tacrolimus [4.77 pg/mL] (\*\* $p < 0.001$ ),

preimplantation factor [27.36 pg/mL] and costimulatory blockade groups [10.59 pg/mL] (\* $p < 0.05$ ).

**IL-2:** there is no significant difference in IL-2 levels between groups in serum. In CSF, the significant difference was visible on day 0 between no immunosuppression [271.9 pg/mL] and:

PiF [146 pg/mL] group (\*\* $p < 0.01$ ),

Tacrolimus [116.1 pg/mL] group (\*\* $p < 0.001$ ),

Costimulatory blockade group [62.88 pg/mL] (\*\* $p < 0.001$ ),

**IL-3:** the levels of IL-3 in serum was undetectable. There is no significant difference between groups in IL-3 (CSF).

**IL-4:** there is no significant difference in IL-4 levels between groups (serum and CSF),

**IL-6:** there is significant difference in IL-6 levels between no immunosuppression [22.2 pg/mL] and PiF [2.47 pg/mL] groups (\* $p < 0.05$ ) on day 28.

**IL-9:** there is no significant difference in IL-9 levels between groups (serum). In CSF the measurements were under detectable range,

**IL-12 (p70):** there is significant difference in serum IL-12 (p70) levels between:

day 0: no immunosuppression [39.41 pg/mL] and costimulatory blockade [379 pg/mL] groups on (\*\* $p < 0.001$ );

day 7: no immunosuppression [22.35 pg/mL] and tacrolimus groups [269.2 pg/mL] (\* $p < 0.05$ ),

no immunosuppression [22.35 pg/mL] and costimulatory blockade groups [309.7 pg/mL] (\* $p < 0.05$ ),

PiF [66.28 pg/mL] and tacrolimus groups [269.2 pg/mL] (\*\* $p < 0.01$ ),

PiF [66.28 pg/mL] and costimulatory blockade groups [309.7 pg/mL] (\*\* $p < 0.01$ ),

day 14: no immunosuppression [19.42 pg/mL] and costimulatory blockade [246.2 pg/mL] groups

(\*\* $p < 0.01$ ),

day 28: no immunosuppression [26.83 pg/mL] and PiF [204.4 pg/mL] groups (\* $p < 0.05$ ),

no immunosuppression [26.83 pg/mL] and tacrolimus groups [224.4 pg/mL] (\* $p < 0.05$ ),

no immunosuppression [26.83 pg/mL] and costimulatory blockade groups [305.5 pg/mL] (\*\* $p < 0.01$ ),

day of death: no immunosuppression [42.45 pg/mL] and tacrolimus groups [363.5 pg/mL] (\*\* $p < 0.01$ ),

no immunosuppression [42.45 pg/mL] and costimulatory blockade groups [449.1 pg/mL] (\*\* $p < 0.01$ ),

PiF [203.8 pg/mL] and costimulatory blockade groups [449.1 pg/mL] (\*\* $p < 0.01$ ),

Levels of IL-12 (p70) in CSF on day 0 was significantly different between:

no immunosuppression [353.3 pg/mL] and tacrolimus [619.6 pg/mL] groups (\*\* p<0.01),

PiF [223.5 pg/mL] and tacrolimus [619.6 pg/mL] groups (\*\*\* p<0.001).

On day of death there was significant difference between:

no immunosuppression [135 pg/mL] and tacrolimus [636.2 pg/mL] groups (\*\*\* p<0.001),

PiF [281.3 pg/mL] and tacrolimus [636.2 pg/mL] groups (\*p<0.05).

**IL-13:** there is no significant difference in IL-13 levels between groups (serum and CSF),

**IL-17:** there is significant difference in serum IL-17 levels on day 7 between PiF [830.8 pg/mL] and:

No immunosuppression group [26.39 pg/mL] (\*\*\* p<0.001),

Tacrolimus group [106.1 pg/mL] (\*\*\*p<0.001),

Costimulatory blockade group [93.7 pg/mL] (\*\*\* p<0.001),

**MCP-1:** there is no significant difference in MCP-1 levels between groups (serum). In CSF the measurements were under detectable range,

**MIP-1 $\alpha$ :** there is no significant difference in MIP-1 $\alpha$  levels between groups (serum). In CSF statistically significant difference was measured between tacrolimus [7.93 pg/mL] and costimulatory blockade group [3.81 pg/mL] on day 0.

**RANTES:** there is a significant difference in RANTES levels in serum:

Day 7: no immunosuppression group [24.72 pg/mL] and tacrolimus group [53.15 pg/mL] (\*\* p<0.01)

PiF [19.26 pg/mL] group and tacrolimus [53.13 pg/mL] group (\*\* p<0.01).

Day 14: no immunosuppression [32.09 pg/mL] and tacrolimus [59.44 pg/mL] group (\* p<0.05),

Day 28: no immunosuppression [31.32 pg/mL] and PiF [57.15 pg/mL] groups (\* p<0.05),

no immunosuppression [31.32 pg/mL] and tacrolimus [69.1 pg/mL] groups (\*\* p<0.01),

Day of death: no immunosuppression [25.33 pg/mL] and PiF [58.96 pg/mL] (\*p<0.05),

No immunosuppression [25.33 pg/mL] and costimulatory blockade [71.92 pg/mL] (\*\*\* p<0.001),

Tacrolimus [40.11 pg/mL] and costimulatory blockade [71.92 pg/mL] groups (\* p<0.05).

There was significant difference between groups measured in CSF:

Day 0: PiF [27.15 pg/mL] and tacrolimus [108.3 pg/mL] groups (\*p<0.05),

Day of death: no immunosuppression [42.01 pg/mL] and tacrolimus [180.8pg/mL] groups (\*\*\* p<0.001),

PiF [19.76 pg/mL] and tacrolimus [180.8 pg/mL] groups (\*\*\* p<0.001),

Tacrolimus [180.8 pg/mL] and costimulatory blockade [61.12 pg/mL] (\*\* p<0.01),

**TNF- $\alpha$ :** there is no significant difference in TNF- $\alpha$  levels between groups (serum and CSF),

**Eotaxin:** there is a significant difference in Eotaxin serum levels between:

Day 0: PiF [3511 pg/mL] and tacrolimus [989.7 pg/mL] groups (\*\* p<0.01),

Tacrolimus [989.7 pg/mL] and costimulatory blockade [3915 pg/mL] groups (\*\*  $p < 0.01$ )

Day 28: no immunosuppression [4288 pg/mL] and PiF [2070 pg/mL] groups (\* $p < 0.05$ ),

Day of death: no immunosuppression [3205 pg/mL] and costimulatory blockade [5801 pg/mL] (\* $p < 0.05$ ),

PiF [2442 pg/mL] and costimulatory blockade groups [5801 pg/mL] (\* $p < 0.05$ ),

Tacrolimus [1141 pg/mL] and costimulatory blockade groups [5801 pg/mL] (\*\* $p < 0.001$ )

In CSF the significant difference of Eotaxin levels was observed on day 0 between PiF [269.4 pg/mL] and tacrolimus [754.9 pg/mL] groups (\*\* $p < 0.01$ ).

**G-CSF**: there is no significant difference in G-CSF levels between groups (serum and CSF),

**IFN- $\gamma$** : there is significant difference in serum IFN- $\gamma$  levels between groups:

Day 0: no immunosuppression [7.9 pg/mL] and PiF [40.7 pg/mL] (\*\* $p < 0.01$ ),

No immunosuppression [7.9 pg/mL] and costimulatory blockade [39.03 pg/mL] (\* $p < 0.05$ ),

PiF [40.7 pg/mL] and tacrolimus [9.03 pg/mL] (\*\* $p < 0.01$ ),

Tacrolimus [9.03 pg/mL] and costimulatory blockade [39.03 pg/mL] (\* $p < 0.05$ ),

Day 7: no immunosuppression [5.81 pg/mL] and PiF [44.07 pg/mL] (\*\* $p < 0.001$ ),

no immunosuppression [5.81 pg/mL] and costimulatory blockade [50.26 pg/mL] (\*\* $p < 0.001$ ),

Day 28: no immunosuppression [6.72 pg/mL] and costimulatory blockade [42.33 pg/mL] (\* $p < 0.05$ ),

Day of death: no immunosuppression [10.01 pg/mL] and tacrolimus [63.67 pg/mL] (\*\* $p < 0.001$ ),

no immunosuppression [10.01 pg/mL] and costimulatory blockade [70.44 pg/mL] (\*\* $p < 0.001$ ),

PiF [21.48 pg/mL] and tacrolimus [63.67 pg/mL] (\* $p < 0.05$ ),

PiF [21.48 pg/mL] and costimulatory blockade [70.44 pg/mL] (\*\* $p < 0.01$ ),

**GM-CSF**: there is no significant difference in of GM-CSF in serum between PiF and costimulatory blockade groups on:

Day 7: PiF [27.97 pg/mL] and costimulatory blockade [63.86 pg/mL] (\* $p < 0.05$ ),

Day 28: PiF [23.66 pg/mL] costimulatory blockade [60.1 pg/mL] (\* $p < 0.05$ ),

Day of death: PiF [33.59 pg/mL] costimulatory blockade [80.93 pg/mL] (\* $p < 0.05$ ),

In CSF the measurements were under detectable range,
